# Supplementary material
Source: PubMed Central journal article supplement (PMC11027802)
Supplement: 262_2020_2510_MOESM1_ESM.pdf [file 262_2020_2510_MOESM1_ESM.pdf]

### Supplementary data

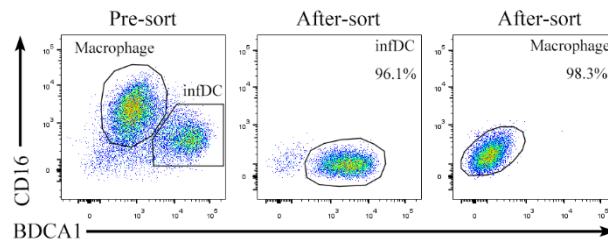

**Fig S1.** Purity of infDCs and macrophages sorted by flow cytometry. Light density cells from malignant pleural effusions were labeled with anti-HLA-DR, CD11c, CD16, CD1c antibodies and sorted by flow cytometry, and then the purity of these cells was detected.

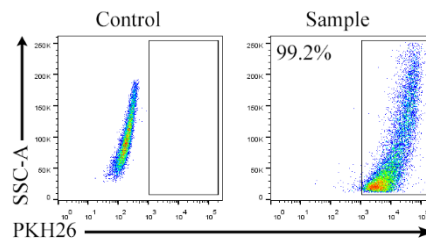

**Fig S2.** HCC827 cells stained with PKH26 red fluorescence. HCC827 cells were obtained, stained with PKH26 and analyzed by flow cytometry.

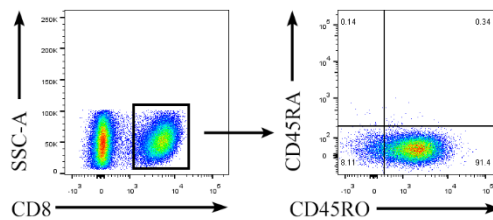

**Fig S3.** CD8<sup>+</sup> T cells from malignant pleural effusions. Light density cells from malignant pleural effusions of NSCLC patients were stained with anti-CD8, CD45RA, and CD45RO antibodies and analyzed by flow cytometry. One representative experiment out of 3 is shown.
